# Supplementary material for: A Non-Conventional Platinum Drug against a Non-Small Cell Lung Cancer Line
Source: MDPI journal article supplement (doi:10.3390/molecules28041698), 2023-02-10
Supplement: s1 [file s1]

# **A non-Conventional Platinum Drug Against a non-Small Cell Lung Cancer Line**

**Jéssica D. Silva <sup>1</sup>, Joana Marques <sup>1</sup>, Inês P. Santos <sup>1</sup>, Ana L.M. Batista de Carvalho <sup>1</sup>,  
Clara B. Martins <sup>1</sup>, Raquel C. Laginha <sup>1</sup>, Luís A.E. Batista de Carvalho <sup>1\*</sup>, M. Paula M. Marques <sup>1,2</sup>**

<sup>1</sup> Molecular Physical-Chemistry R&D Unit, Department of Chemistry, University of Coimbra, 3004-535 Coimbra, Portugal

<sup>2</sup> Department of Life Sciences, Faculty of Science and Technology, University of Coimbra, 3000-456 Coimbra, Portugal

\* Correspondence: labc@ci.uc.pt; Tel.: +351 239 854 462

## **Supplementary Material**

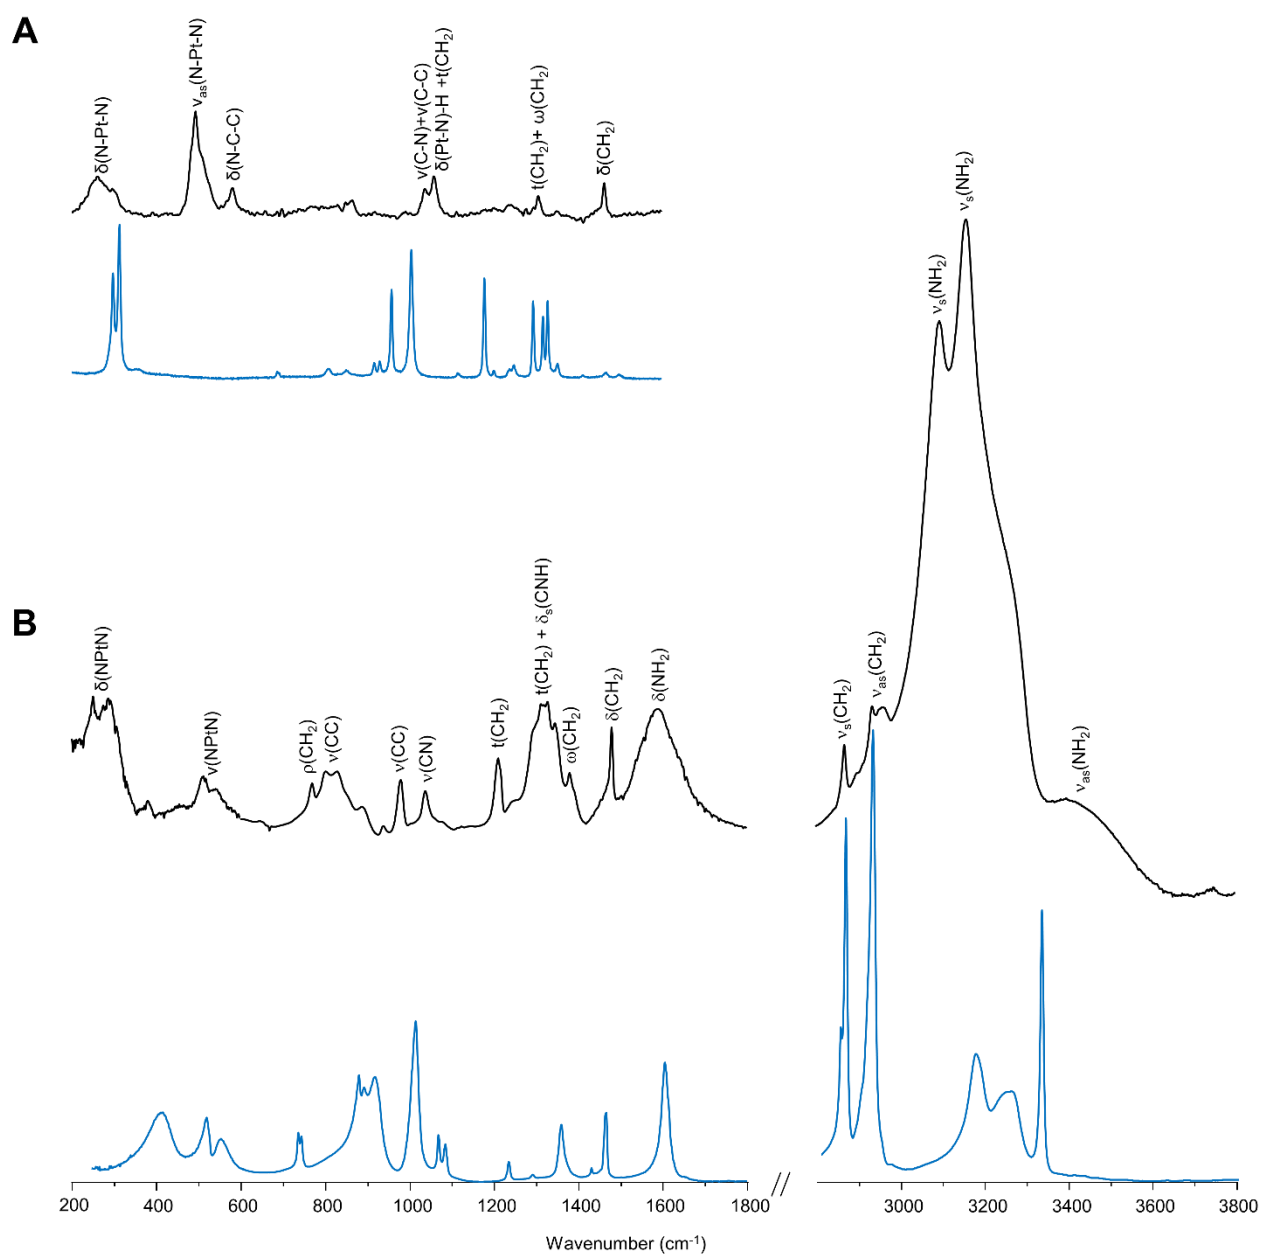

**Figure S1.** Raman (A) and FTIR (B, far- and mid-infrared regions) spectra of  $[\text{Pt}_2\text{Put}_2(\text{NH}_3)_4]^{4+}$  (black line) and putrescine (blue line) (solid state).

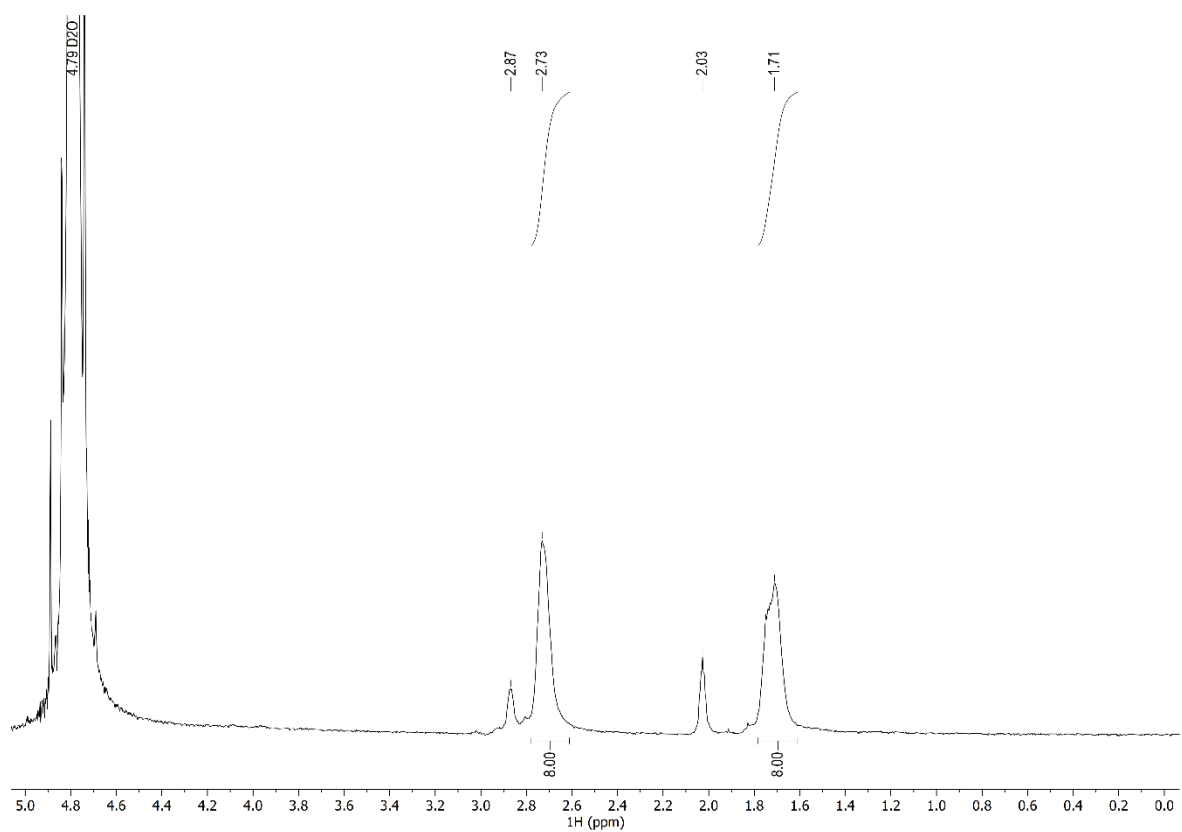

**Figure S2.** NMR spectrum of  $[\text{Pt}_2\text{Put}_2(\text{NH}_3)_4]^{4+}$  in a  $\text{D}_2\text{O}$  solution.
